# Supplementary material for: Solution-processed small molecule transistors with low operating voltages and high grain-boundary anisotropy
Source: Royal Society of Chemistry journal article supplement (doi:10.1039/c2jm30893b), 2012-01-01
Supplement: c2jm30893b.pdf [file c2jm30893b.pdf]

## Supplementary Information

### Solution-processed small molecule transistors with low operating voltages and high grain-boundary anisotropy

Liyang Yu,<sup>\*1,2</sup> Xiaoran Li,<sup>\*3,4</sup> Jeremy Smith,<sup>2,5</sup> Steven Tierney,<sup>6</sup> Richard Sweeney,<sup>1</sup> B. K. Charlotte Kjellander,<sup>4</sup> Gerwin H. Gelinck,<sup>4</sup> Thomas D. Anthopoulos,<sup>2,5</sup> Natalie Stingelin<sup>1,2,7</sup>

<sup>1</sup>Department of Materials, Imperial College London, SW7 2AZ London, UK, <sup>2</sup>Centre for Plastic Electronics, Imperial College London, SW7 2AZ London, UK, <sup>3</sup>Department of Chemical Engineering and Chemistry, Technische Universiteit Eindhoven, P.O. Box 513, 5600 MB Eindhoven, the Netherlands, <sup>4</sup>Holst Centre/TNO, High Tech Campus 31, 5656 AE Eindhoven, the Netherlands, <sup>5</sup>Department of Physics, Imperial College London, SW7 2AZ London, UK, <sup>6</sup>Merck Chemicals Ltd., University Parkway, Southampton SO16 7QD, UK, <sup>7</sup>FRIAS, School of Soft Matter Research, University of Freiburg, 79104 Freiburg, Germany

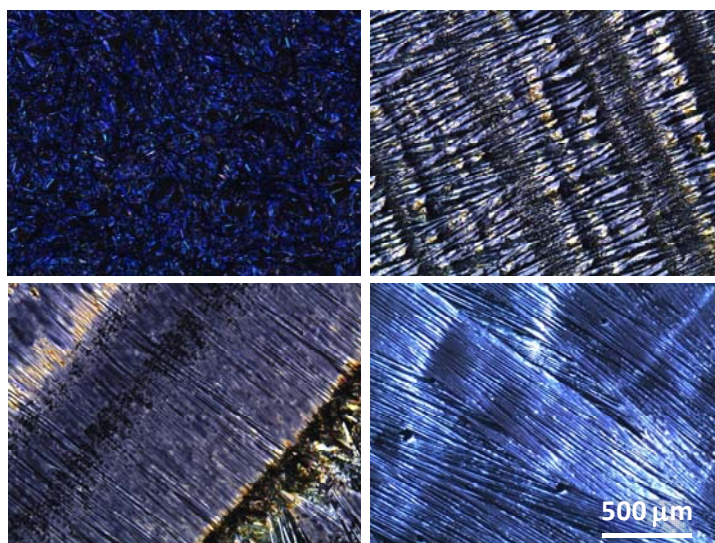

Figure S1. Polarized optical micrographs of BTE-TIPS thin films, solution-cast, respectively, from 0.5 wt% chloroform solutions at room temperature (top left); 0.5 wt% decalin solutions at 100 °C (top right); 0.5 wt% decalin solution at 150 °C (bottom left); 0.5 wt% xylene solution at 100 °C (bottom right).

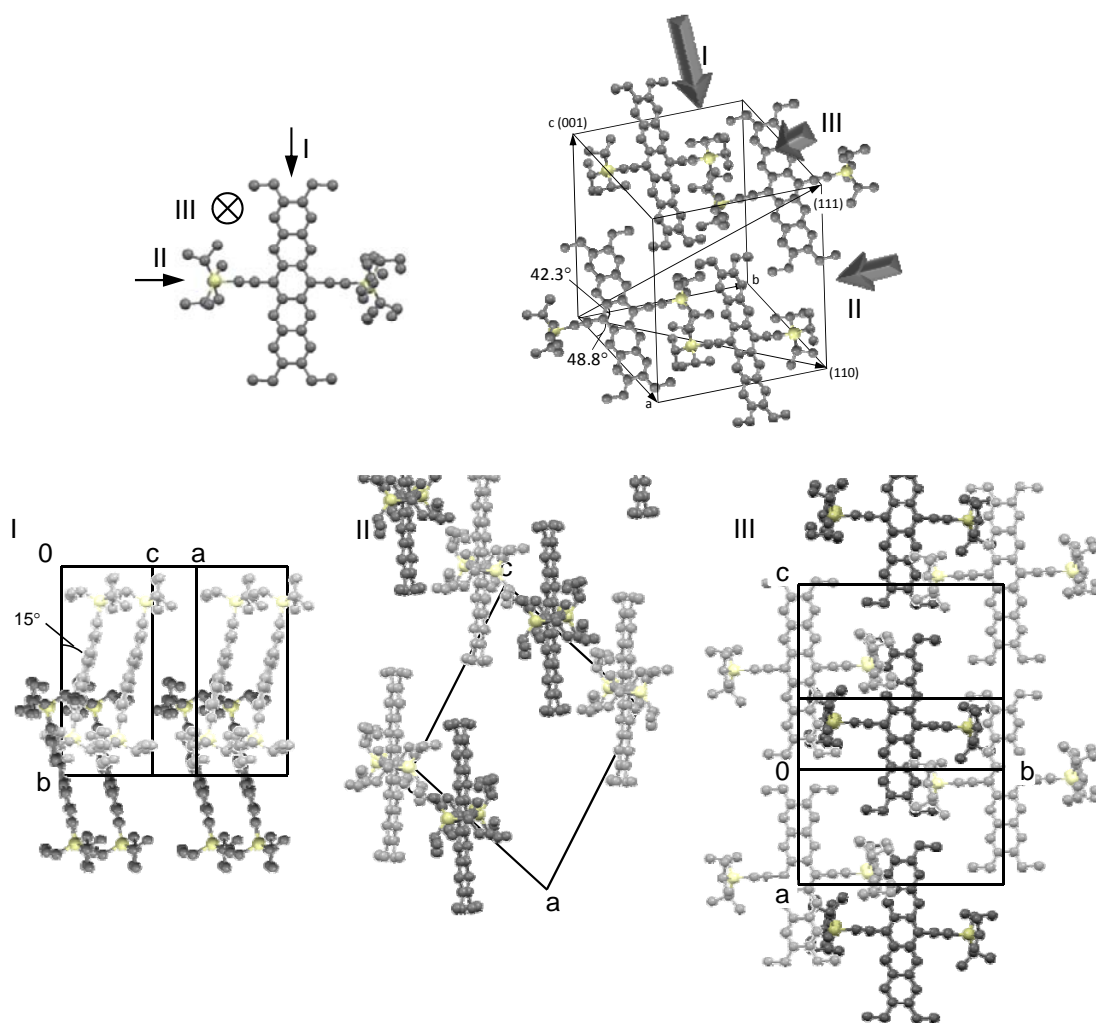

Figure S2. Molecular packing of BTE-TIPS cast from decalin. Top: BTE-TIPS molecule (left) and crystal unit cell (right) with the relevant molecular directions (i.e. along the side chain (I), along the backbone (II) and along the  $\pi$ - $\pi$  stack are indicated (III)) indicated with arrows. Bottom: View of the unit cell, left, along the side chain (I); middle: the backbone (II); and right: the  $\pi$ - $\pi$  stack.

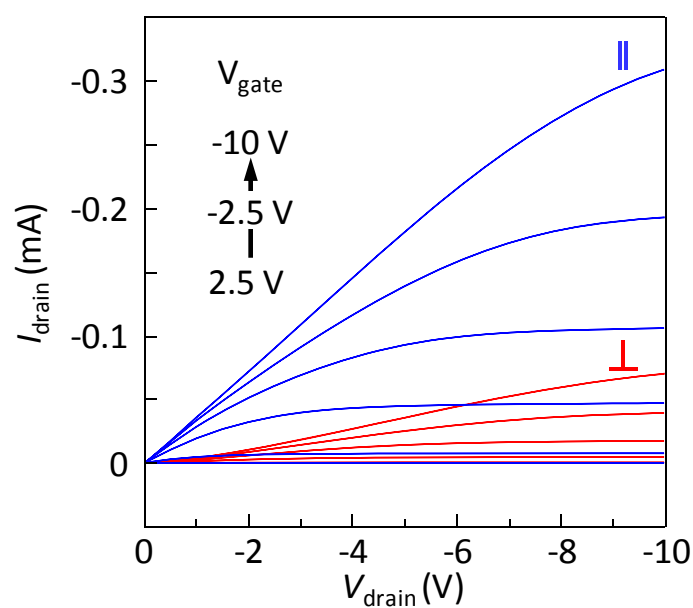

Figure S3. Typical output characteristics of BTE-TIPS in bottom-gate/bottom-contact transistors with, needles oriented parallel (blue) and perpendicular (red) to the source-drain bias direction.
